# Supplementary figures and images for: ARTD2 activity is stimulated by RNA
Source: PubMed Central journal article supplement — Nucleic Acids Res. 2014 Feb 8;42(8):5072–82. doi: 10.1093/nar/gku131 (PMC4005644; doi:10.1093/nar/gku131), 2014-02-08

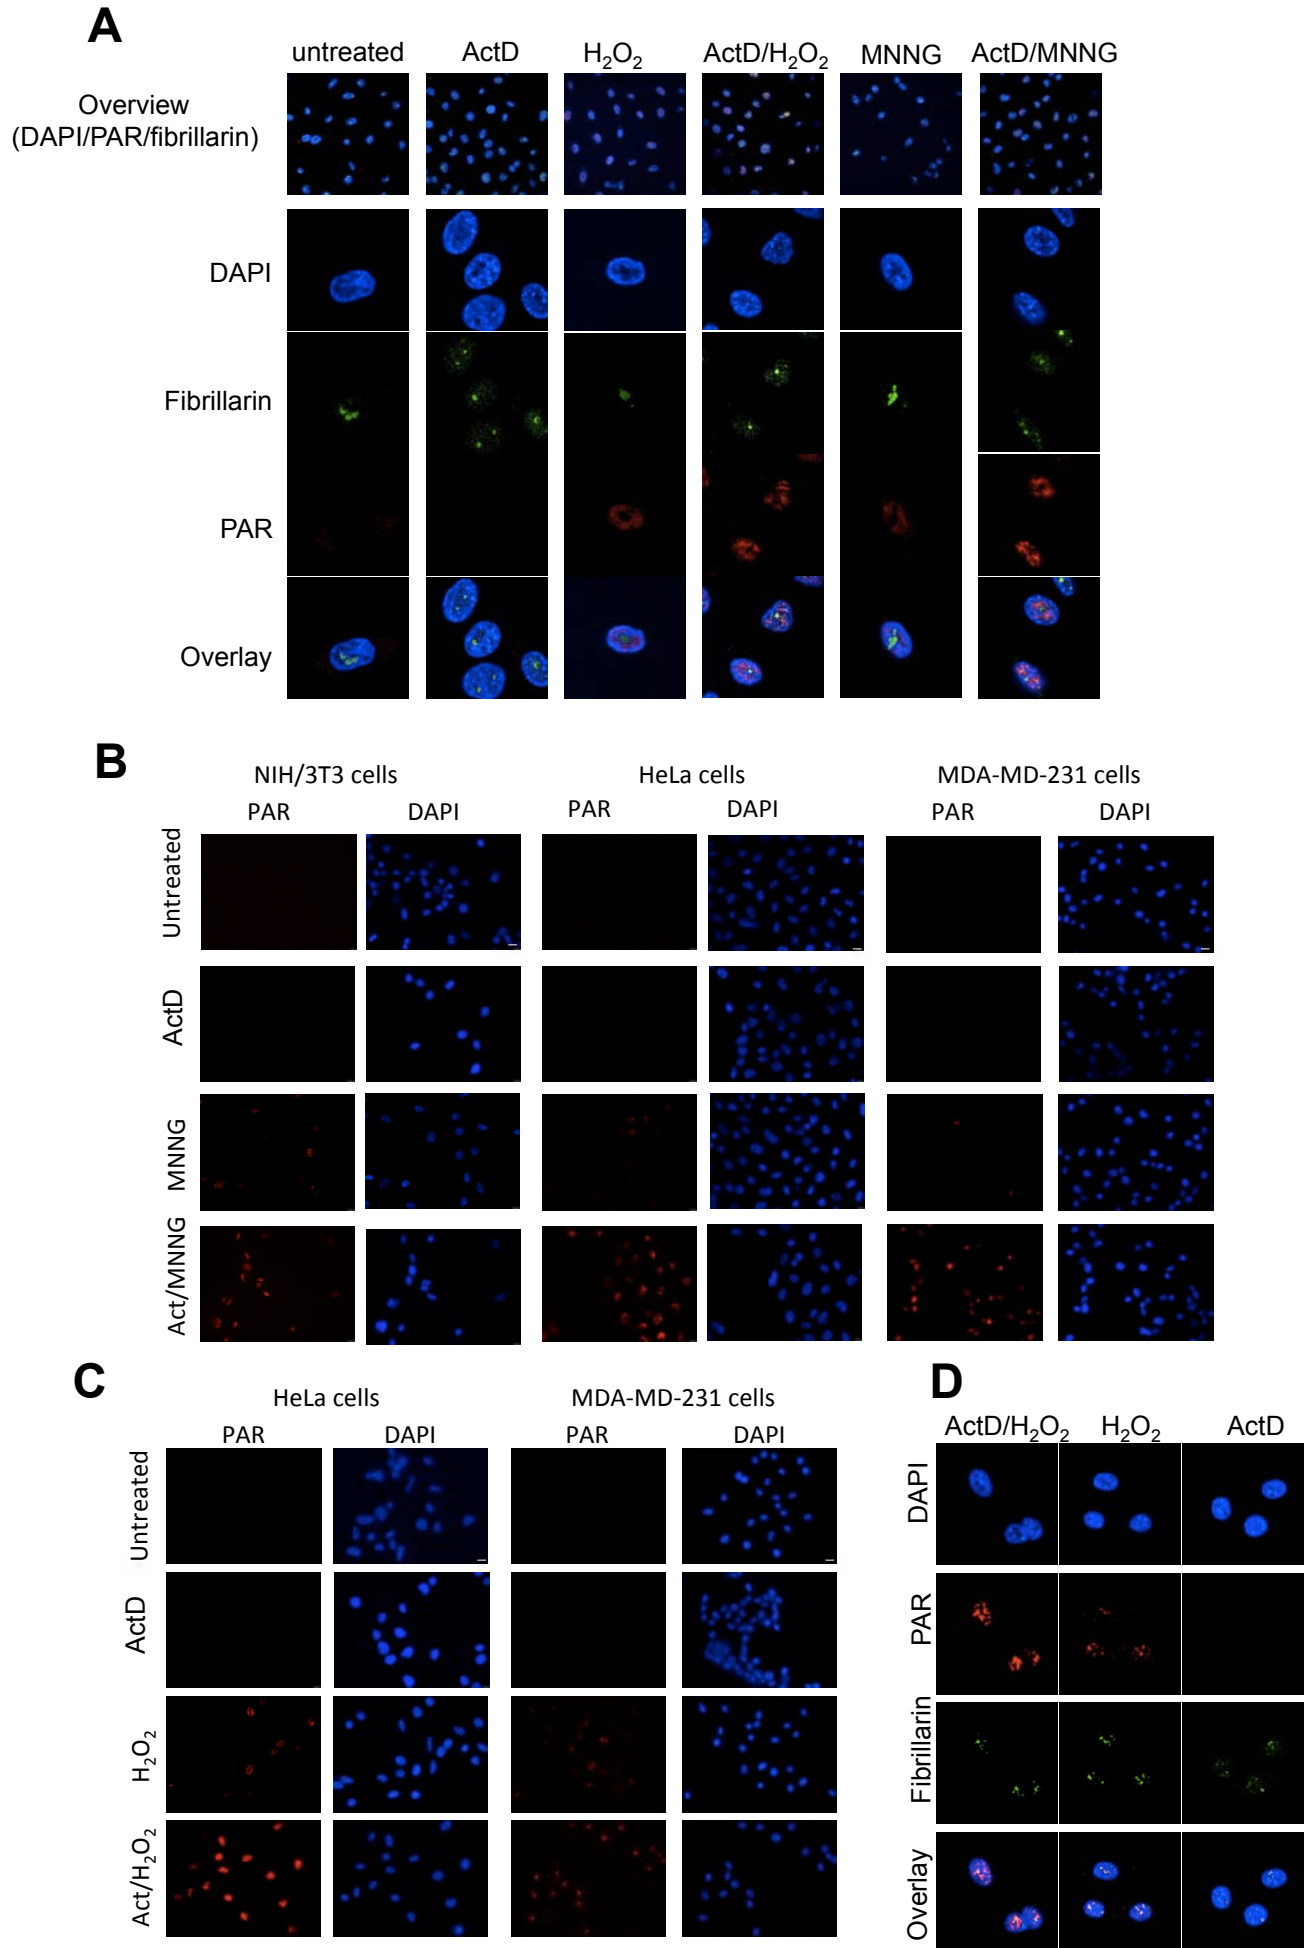

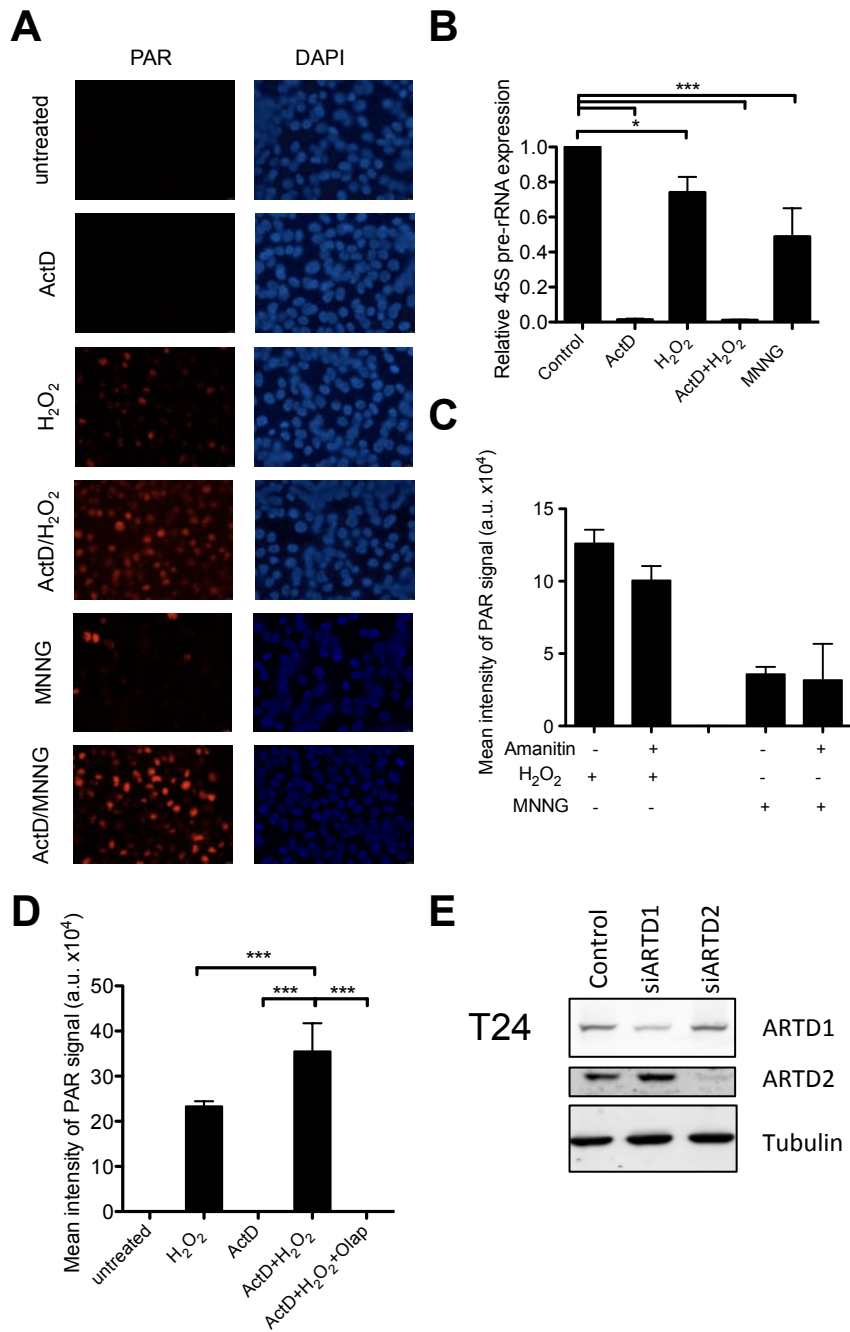

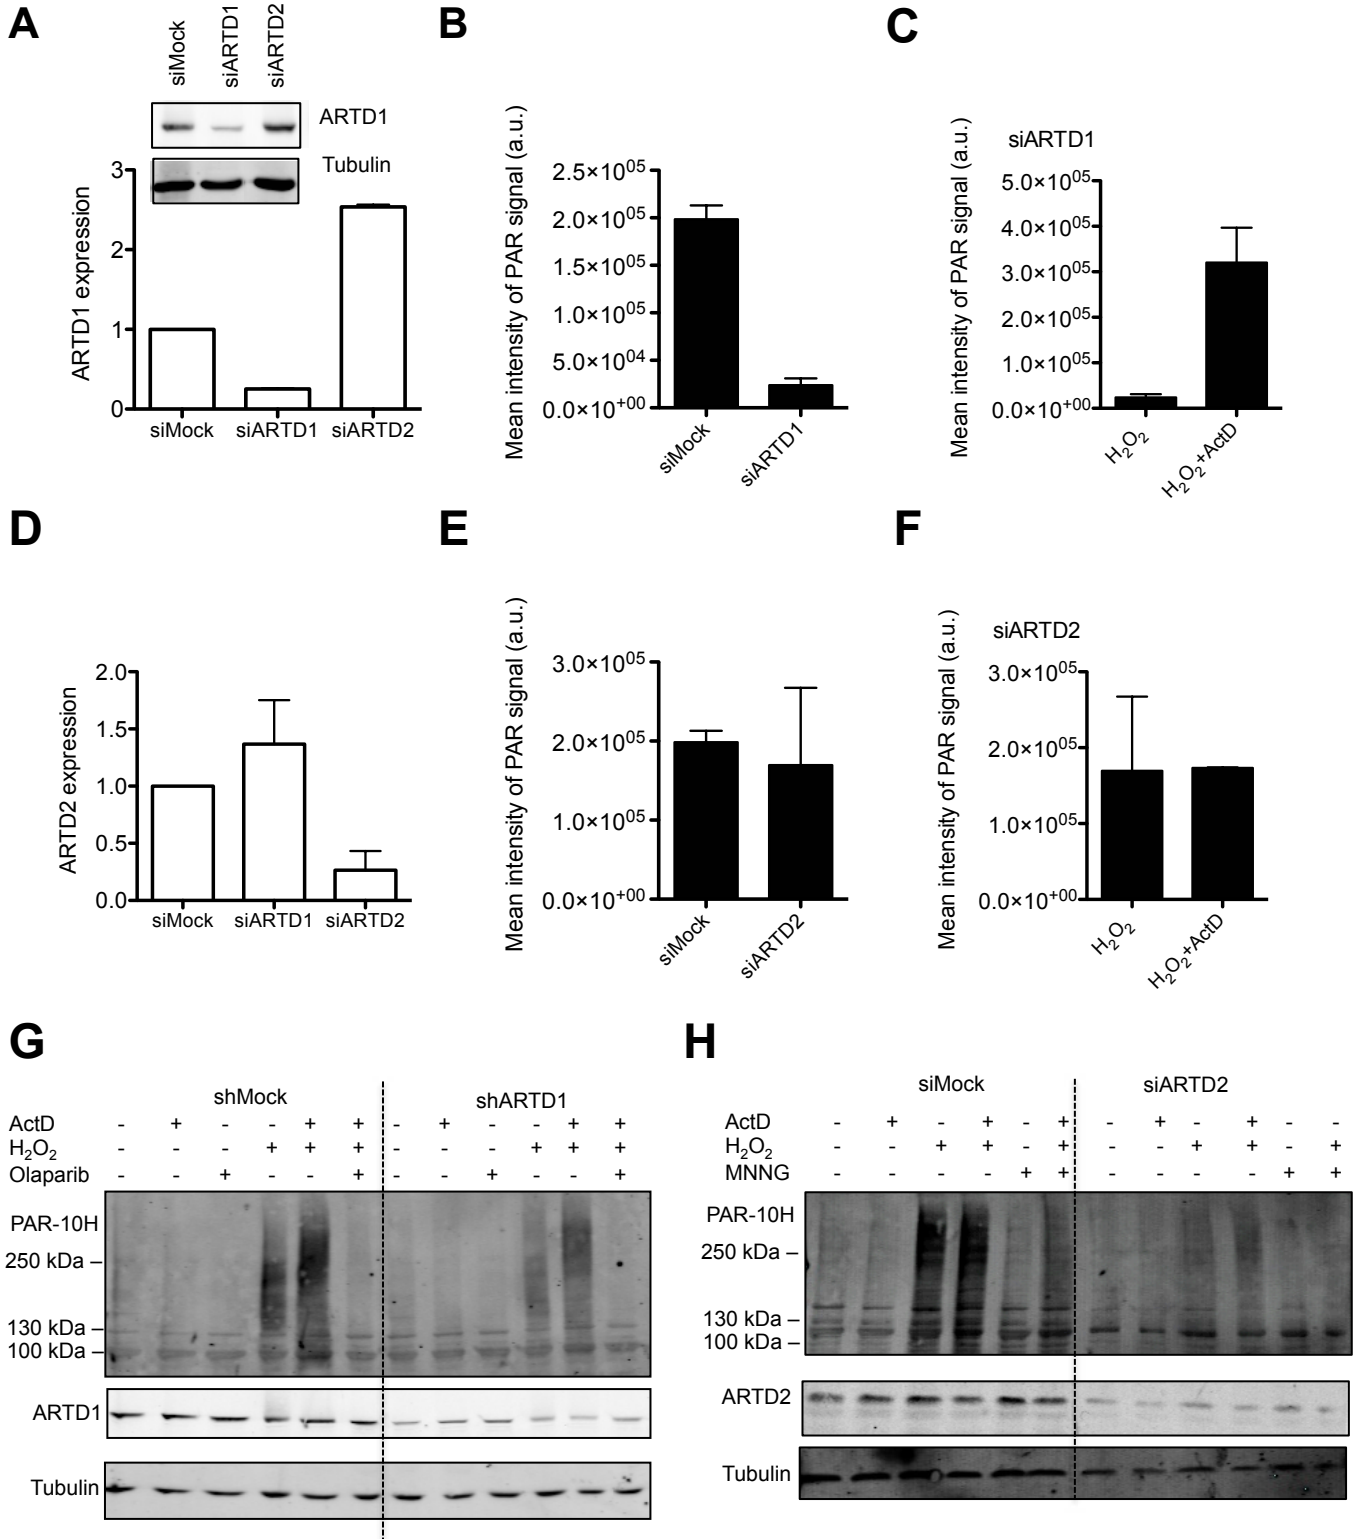

**A**

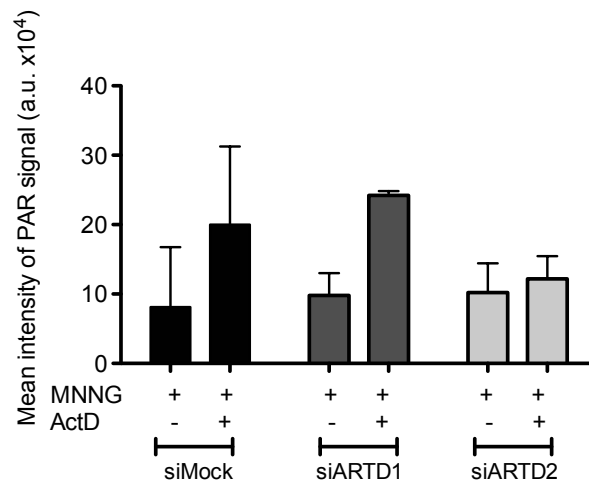

**B**

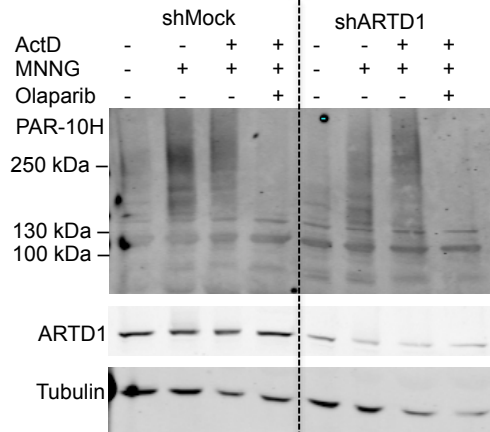

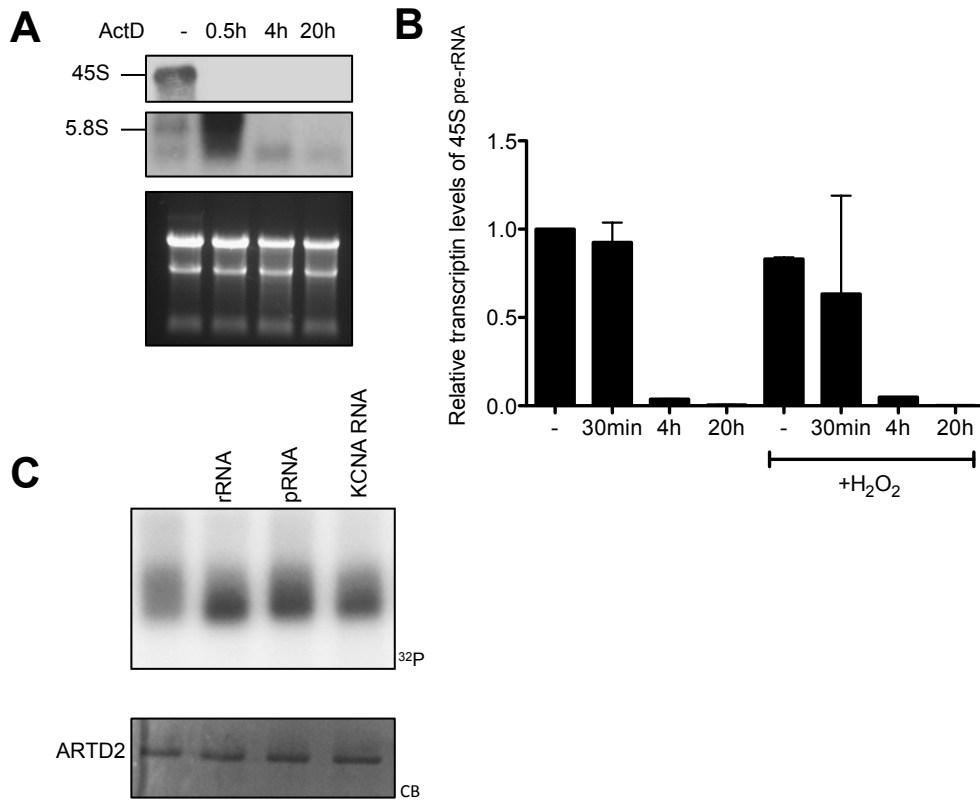

Supplement: supp_gku131_nar-03252-v-2013-File006.pdf [file supp_gku131_nar-03252-v-2013-File006.pdf]
